# Supplementary material
Source: PubMed Central journal article supplement (PMC2785295)
Supplement: 0906522106_0906522106SI.pdf [file 0906522106_0906522106SI.pdf]

# Supporting Information

Bradaia et al. 10.1073/pnas.0906522106

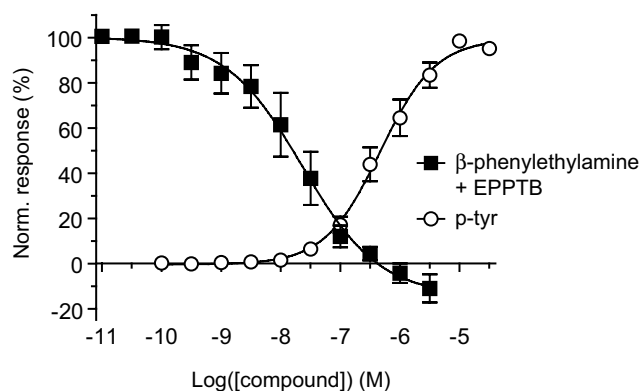

**Fig. S1.** Inhibition of the TAAR1-mediated increase in cAMP levels by EPPTB in transfected HEK293 cells. Open circles, cAMP accumulation in response to increasing concentrations of  $p$ -tyr ( $EC_{50} = 545 \pm 179$  nM). Data were normalized to the cAMP level obtained with  $10 \mu\text{M}$   $\beta$ -phenylethylamine. Filled squares, inhibition of  $\beta$ -phenylethylamine ( $1.5 \mu\text{M}$ )-mediated cAMP accumulation by increasing concentrations of EPPTB ( $IC_{50} = 27.5 \pm 9.4$  nM). Bars show mean values  $\pm$  SEM of four experiments. Data analysis and curve fitting was performed using nonlinear regression (GraphPad Prism Version 5.01).

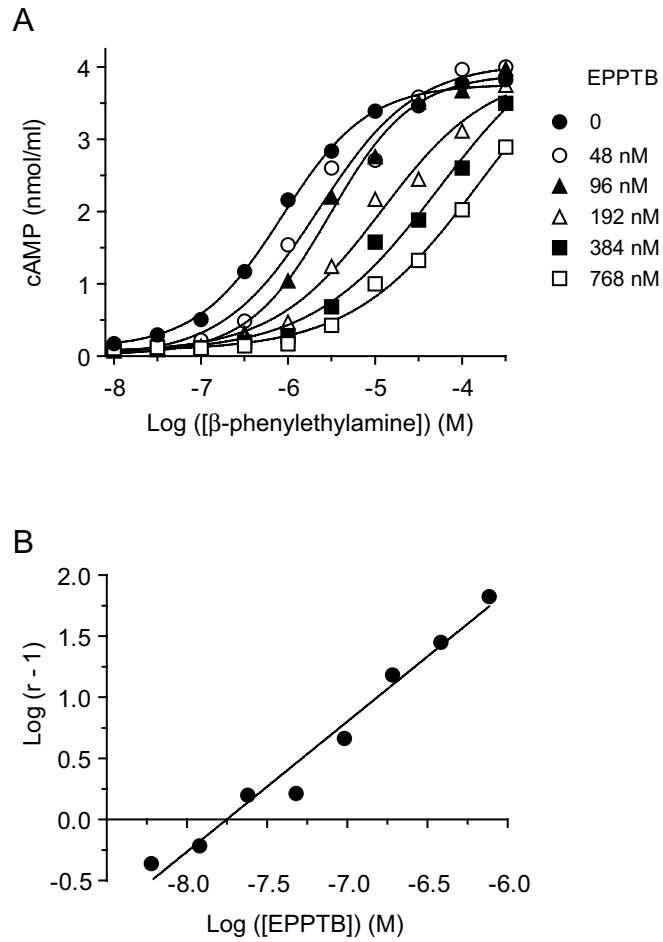

**Fig. S2.** Schild plot analysis of EPPTB in transfected HEK293. (A) Concentration-response curves for the  $\beta$ -phenylethylamine-induced accumulation of cAMP under control conditions and in the presence of increasing concentrations of EPPTB (48–768 nM, 2-fold increases). A representative experiment is shown. (B) Schild plot derived from the concentration-response curves of two independent experiments. The concentration ratio  $r$  is the  $EC_{50}$  for  $\beta$ -phenylethylamine in the presence of EPPTB divided by the  $EC_{50}$  for  $\beta$ -phenylethylamine under control conditions. The slope of the line fitted to the concentration ratios is 1.065, which suggests that EPPTB is a competitive antagonist.

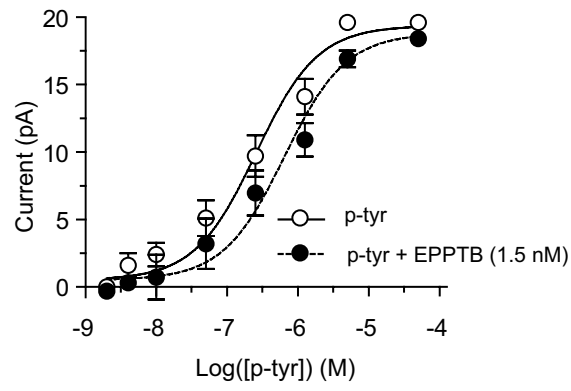

**Fig. S3.** The dose-response curve of the *p*-tyr-induced  $K^+$  current amplitude at DA neurons is shifted to the right in the presence of 1.5 nM EPPTB, with no significant reduction in the maximally *p*-tyr-induced current amplitude ( $EC_{50}$  values: *p*-tyr,  $305 \pm 11$  nM; *p*-tyr + EPPTB,  $650 \pm 11$  nM). This is consistent with a competitive mode of action of EPPTB at the *p*-tyr binding-site.

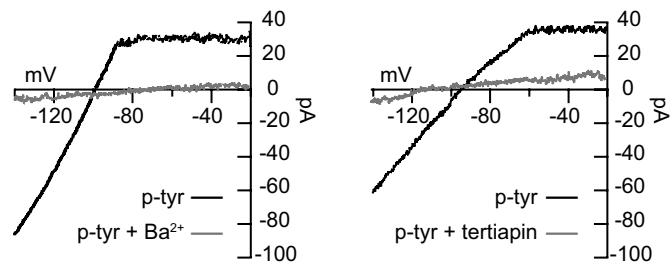

**Fig. S4.** The *p*-tyr induced K<sup>+</sup> current in DA neurons of the VTA is sensitive to Ba<sup>2+</sup> and tertiapin. The *p*-tyr induced currents were obtained by calculating the difference between the I–V curves before and after addition of *p*-tyr (10 μM), both in the absence (black traces) and presence (gray traces) of the nonselective K<sup>+</sup> channel blocker Ba<sup>2+</sup> (300 μM) and the Kir3 channel blocker tertiapin (10 μM), respectively. This suggests that the activation of Kir3 channels underlies the *p*-tyr induced K<sup>+</sup> current in DA neurons of the VTA.

**Table S1. Percent inhibition of control specific binding (mean  $\pm$  SEM) is shown for EPPTB (10  $\mu$ M) on several receptors and transporters**

| Receptors/ Transporters       | Assay                      | % Inhibition of Control Specific Binding | SEM % Control |
|-------------------------------|----------------------------|------------------------------------------|---------------|
| Dopamine receptors            | D1                         | 25                                       | 6.3           |
|                               | D2S                        | 9                                        | 8.9           |
| 5-HT receptors                | 5-HT1A                     | 4                                        | 1.6           |
|                               | 5-HT1B                     | 53                                       | 4.2           |
|                               | 5-HT2A                     | 21                                       | 3.3           |
|                               | 5-HT3                      | 9                                        | 1.3           |
|                               | 5-HT5A                     | 21                                       | 1.1           |
|                               | 5-HT6                      | 7                                        | 0.9           |
|                               | 5-HT7                      | 10                                       | 2.9           |
| Adrenergic receptors          | alpha 1 (non-selective)    | 8                                        | 3.6           |
|                               | alpha 2 (non-selective)    | 23                                       | 4.0           |
|                               | beta 1                     | 4                                        | 1.5           |
|                               | beta 2                     | 6                                        | 3.1           |
| Muscarinic receptors          | M1                         | 4                                        | 7.8           |
|                               | M2                         | -1                                       | 6.5           |
|                               | M3                         | -10                                      | 1.2           |
| Neurotransmitter transporters | Norepinephrine transporter | 44                                       | 2.5           |
|                               | Dopamine transporter       | 43                                       | 1.2           |
|                               | 5-HT transporter           | -7                                       | 4.6           |

The results were obtained from three independent experiments.
